# Supplementary material for: Copper-based metal–organic frameworks for CO2reduction: selectivity trends, design paradigms, and perspectives
Source: Royal Society of Chemistry journal article supplement (doi:10.1039/d3cy00408b), 2023-01-01
Supplement: d3cy00408b1.pdf [file d3cy00408b1.pdf]

## Supplementary Information

### Copper-Based Metal-Organic Frameworks for CO<sub>2</sub> Reduction: Selectivity Trends, Design Paradigms, and Perspectives

Ugochukwu Nwosu<sup>a</sup> and Samira Siahrostami<sup>\*a</sup>

Department of Chemistry, University of Calgary, Calgary, Alberta T2N 1N4, Canada

\*E-mail: samira.siahrostami@ucalgary.ca

### Table of Contents

|                                                                                                         |            |
|---------------------------------------------------------------------------------------------------------|------------|
| <b>Table S1: CO<sub>2</sub>RR Faradaic Efficiencies for Cu MOF and Cu MOF Composites.....</b>           | <b>S2</b>  |
| <b>Table S2: &gt;2e<sup>-</sup> Product Faradaic Efficiencies for Cu MOF and Cu MOF Composites.....</b> | <b>S5</b>  |
| <b>Table S3: C<sub>2+</sub> Product Faradaic Efficiencies for Cu MOF and Cu MOF Composites. ....</b>    | <b>S8</b>  |
| <b>Data Aggregation Methodology.....</b>                                                                | <b>S12</b> |

**Table S1: CO<sub>2</sub>RR Faradaic Efficiencies for Cu MOF and Cu MOF Composites.**

| Ref | Cu MOF                              | Cluster or Node-based <sup>1</sup> | Secondary Building Unit                               | Cu Oxidation State | Electrolyte                    | Cell Type | FE CO <sub>2</sub> RR <sup>2</sup> | Reported Potential (V) | Scale   | Total Current Density (mA cm <sup>-2</sup> ) <sup>3</sup> | Evidence of In Situ Transformation <sup>4</sup> |
|-----|-------------------------------------|------------------------------------|-------------------------------------------------------|--------------------|--------------------------------|-----------|------------------------------------|------------------------|---------|-----------------------------------------------------------|-------------------------------------------------|
| 1   | CuAdeAce                            | cluster                            | Cu <sub>2</sub> (ade) <sub>2</sub> (ace) <sub>2</sub> | NR*                | 0.5 M KHCO <sub>3</sub>        | Flow      | 1.2                                | -1.75                  | Ag/AgCl | 10                                                        | Yes                                             |
| 1   | HKUST-1                             | cluster                            | Cu <sub>2</sub> (COO) <sub>4</sub>                    | NR*                | 0.5 M KHCO <sub>3</sub>        | Flow      | 15.9                               | -0.9                   | Ag/AgCl | 10                                                        | Yes                                             |
| 2   | CuBi9                               | cluster                            | Cu <sub>2</sub> (COO) <sub>4</sub>                    | NR*                | 0.5 M KHCO <sub>3</sub>        | Flow      | 55                                 | -0.36                  | RHE     | 20                                                        | No                                              |
| 2   | CuBi12                              | cluster                            | Cu <sub>2</sub> (COO) <sub>4</sub>                    | NR*                | 0.5 M KHCO <sub>3</sub>        | Flow      | 66.3                               | -0.21                  | RHE     | 20                                                        | Yes                                             |
| 2   | CuBi84                              | cluster                            | Cu <sub>2</sub> (COO) <sub>4</sub>                    | NR*                | 0.5 M KHCO <sub>3</sub>        | Flow      | 61                                 | -0.34                  | RHE     | 20                                                        | No                                              |
| 2   | Cu100                               | cluster                            | Cu <sub>2</sub> (COO) <sub>4</sub>                    | NR*                | 0.5 M KHCO <sub>3</sub>        | Flow      | 40                                 | -0.59                  | RHE     | 20                                                        | Yes                                             |
| 3   | Cu-BDC                              | cluster                            | Cu <sub>2</sub> (COO) <sub>4</sub>                    | +1, +2             | 1 M KOH                        | Flow      | 70                                 | -1.35                  | RHE     | 120                                                       | Yes                                             |
| 3   | NH <sub>2</sub> -Cu-BDC             | cluster                            | Cu <sub>2</sub> (COO) <sub>4</sub>                    | +1, +2             | 1 M KOH                        | Flow      | 75                                 | -0.85                  | RHE     | 60                                                        | Yes                                             |
| 3   | OH-Cu-BDC                           | cluster                            | Cu <sub>2</sub> (COO) <sub>4</sub>                    | +1, +2             | 1 M KOH                        | Flow      | 66                                 | -1.01                  | RHE     | 60                                                        | Yes                                             |
| 3   | F-Cu-BDC                            | cluster                            | Cu <sub>2</sub> (COO) <sub>4</sub>                    | +1, +2             | 1 M KOH                        | Flow      | 81                                 | -1.21                  | RHE     | 90                                                        | Yes                                             |
| 3   | 2F-Cu-BDC                           | cluster                            | Cu <sub>2</sub> (COO) <sub>4</sub>                    | +1, +2             | 1 M KOH                        | Flow      | 79                                 | -1.45                  | RHE     | 150                                                       | Yes                                             |
| 4   | NNU-50                              | cluster                            | Cu <sub>6</sub> MePz                                  | NR*                | 1 M KOH                        | Flow      | 87.49                              | -0.6                   | RHE     | 54                                                        | No                                              |
| 5   | CR-MOF                              | node                               | CuN <sub>2</sub> S <sub>2</sub>                       | NR*                | 0.5 M KHCO <sub>3</sub>        | H         | 30                                 | -1.6                   | SHE     | 20.95                                                     | No                                              |
| 6   | Cu <sub>3</sub> (HHTP) <sub>2</sub> | node                               | CuO <sub>4</sub>                                      | NR*                | 0.1 M KHCO <sub>3</sub>        | H         | 1.9                                | -0.3                   | RHE     | 0.5                                                       | No                                              |
| 6   | Cu <sub>3</sub> (HHTQ) <sub>2</sub> | node                               | CuO <sub>4</sub>                                      | +2                 | 0.1 M KHCO <sub>3</sub>        | H         | 53.6                               | -0.4                   | RHE     | 0.5                                                       | No                                              |
| 7   | HATNA-Cu-MOF                        | node                               | CuO <sub>4</sub>                                      | +1, +2             | 0.1 M KHCO <sub>3</sub>        | H         | 81                                 | -1.5                   | RHE     | 10.5                                                      | No                                              |
| 8   | Cu-DBC                              | node                               | CuO <sub>5</sub>                                      | +1, +2             | 0.1 M KHCO <sub>3</sub>        | H         | 68                                 | -1.4                   | RHE     | 11.4                                                      | No                                              |
| 9   | Cu-THQ                              | node                               | CuO <sub>4</sub>                                      | +1, +2             | 1 M choline chloride + 1 M KOH | H         | 91                                 | -0.43                  | RHE     | 173                                                       | No                                              |
| 10  | Cu <sub>3</sub> (HHTP) <sub>2</sub> | node                               | CuO <sub>4</sub>                                      | NR*                | KHCO <sub>3</sub>              | H         | 4.3                                | -0.64                  | RHE     | NR*                                                       | No                                              |
| 10  | CoPc-Cu-O                           | node                               | CuO <sub>4</sub>                                      | +1, +2             | KHCO <sub>3</sub>              | H         | 85                                 | -0.74                  | RHE     | 17.1                                                      | No                                              |
| 10  | CoPc-Cu-NH                          | node                               | CuN <sub>4</sub>                                      | +1, +2             | KHCO <sub>3</sub>              | H         | 72                                 | -0.74                  | RHE     | 11.6                                                      | No                                              |

|    |                                     |         |                                    |           |                         |      |      |       |                    |       |     |
|----|-------------------------------------|---------|------------------------------------|-----------|-------------------------|------|------|-------|--------------------|-------|-----|
| 10 | NiPc-Cu-O                           | node    | CuO <sub>4</sub>                   | +1, +2    | KHCO <sub>3</sub>       | H    | 56   | -0.74 | RHE                | 7.3   | Yes |
| 10 | NiPc-Cu-NH                          | node    | CuN <sub>4</sub>                   | +1, +2    | KHCO <sub>3</sub>       | H    | 43   | -0.74 | RHE                | 6.1   | No  |
| 10 | Pc-Cu-O                             | node    | CuO <sub>4</sub>                   | +1, +2    | KHCO <sub>3</sub>       | H    | 5.6  | -0.74 | RHE                | 7.5   | Yes |
| 10 | Pc-Cu-NH                            | node    | CuN <sub>4</sub>                   | +1, +2    | KHCO <sub>3</sub>       | H    | 4.5  | -0.74 | RHE                | 8     | No  |
| 10 | Cu <sub>3</sub> (HITP) <sub>2</sub> | node    | CuN <sub>4</sub>                   | NR*       | KHCO <sub>3</sub>       | H    | 3.3  | -0.74 | RHE                | n/a   | No  |
| 11 | HKUST-1                             | cluster | Cu <sub>2</sub> (COO) <sub>4</sub> | +2        | 1 M KOH                 | Flow | 57   | -1.08 | RHE                | NR*   | Yes |
| 11 | HKUST-1 (thermally treated)         | cluster | Cu <sub>2</sub> (COO) <sub>4</sub> | +1, +2    | 1 M KOH                 | Flow | 70   | -1.07 | RHE                | 262   | Yes |
| 12 | PcCu-Cu-O                           | node    | CuO <sub>4</sub>                   | +1, +2    | 0.1 M KHCO <sub>3</sub> | H    | 68   | -1.4  | RHE                | 7.8   | No  |
| 12 | PcCo-Cu-O                           | node    | CuO <sub>4</sub>                   | NR*       | 0.1 M KHCO <sub>3</sub> | H    | 60   | -1    | RHE                | NR*   | No  |
| 12 | Cu-HHTP                             | node    | CuO <sub>4</sub>                   | NR*       | 0.1 M KHCO <sub>3</sub> | H    | 50   | -1.2  | RHE                | NR*   | No  |
| 13 | HKUST-1                             | cluster | Cu <sub>2</sub> (COO) <sub>4</sub> | 0, +1, +2 | 0.01 M TBATFB/DMF       | 3EC^ | 51   | -2.5  | Ag/Ag <sup>+</sup> | NR*   | No  |
| 14 | Cu <sub>2</sub> O@Cu-MOF            | cluster | Cu <sub>2</sub> (COO) <sub>4</sub> | 0, +1, +2 | 0.1 M KHCO <sub>3</sub> | H    | 89.1 | -1.71 | RHE                | 13.29 | Yes |
| 14 | Cu-MOF                              | cluster | Cu <sub>2</sub> (COO) <sub>4</sub> | +1, +2    | 0.1 M KHCO <sub>3</sub> | H    | 49.7 | -1.71 | RHE                | n/a   | Yes |
| 15 | PCZ-2                               | cluster | Cu <sub>2</sub> (COO) <sub>4</sub> | 0, +1, +2 | 0.1 M KHCO <sub>3</sub> | H    | 95   | -0.75 | RHE                | 2.6   | No  |
| 16 | Cu-MOF-74                           | cluster | Cu-O-C rod                         | +1, +2    | 0.1 M KHCO <sub>3</sub> | H    | 87   | -1.8  | SCE                | 4     | No  |
| 17 | CuO/Cu-MOF                          | cluster | Cu <sub>2</sub> (COO) <sub>4</sub> | +2        | 0.1 M KHCO <sub>3</sub> | H    | 65   | -1.1  | RHE                | 14    | Yes |
| 17 | Cu-MOF                              | cluster | Cu <sub>2</sub> (COO) <sub>4</sub> | NR*       | 0.1 M KHCO <sub>3</sub> | H    | 49   | -1.1  | RHE                | 12.7  | No  |
| 17 | 2Cl-Cu-BDC                          | cluster | Cu <sub>2</sub> (COO) <sub>4</sub> | NR*       | 0.1 M KHCO <sub>3</sub> | H    | 40   | -1.1  | RHE                | 10    | No  |
| 17 | 2Br-Cu-BDC                          | cluster | Cu <sub>2</sub> (COO) <sub>4</sub> | NR*       | 0.1 M KHCO <sub>3</sub> | H    | 44   | -1.1  | RHE                | 10    | No  |
| 17 | 2OH-Cu-BDC                          | cluster | Cu <sub>2</sub> (COO) <sub>4</sub> | NR*       | 0.1 M KHCO <sub>3</sub> | H    | 6    | -1.1  | RHE                | NR*   | No  |
| 17 | 2NH <sub>2</sub> -Cu-BDC            | cluster | Cu <sub>2</sub> (COO) <sub>4</sub> | NR*       | 0.1 M KHCO <sub>3</sub> | H    | 9    | -1.1  | RHE                | NR*   | No  |
| 17 | NH <sub>2</sub> -Cu-BDC             | cluster | Cu <sub>2</sub> (COO) <sub>4</sub> | NR*       | 0.1 M KHCO <sub>3</sub> | H    | 8    | -1.1  | RHE                | NR*   | No  |
| 18 | PA-Cu-DBC-1                         | node    | CuO <sub>5</sub>                   | +2        | 0.5 M KHCO <sub>3</sub> | H    | 96.5 | -1.1  | RHE                | 47    | No  |
| 18 | PA-Cu-DBC-2                         | node    | CuO <sub>5</sub>                   | +2        | 0.5 M KHCO <sub>3</sub> | H    | 71   | -1.1  | RHE                | 36    | No  |
| 18 | Cu-DBC                              | node    | CuO <sub>5</sub>                   | +2        | 0.5 M KHCO <sub>3</sub> | H    | 54   | -1    | RHE                | 16    | No  |

|    |                                       |         |                                                      |           |                                                         |      |       |       |                    |       |     |
|----|---------------------------------------|---------|------------------------------------------------------|-----------|---------------------------------------------------------|------|-------|-------|--------------------|-------|-----|
| 19 | Cu <sub>2</sub> (CuTCPP)              | cluster | Cu <sub>2</sub> (COO) <sub>4</sub>                   | +1, +2    | CH <sub>3</sub> CN/H <sub>2</sub> O/EMIMBF <sub>4</sub> | H    | 97.2  | -1.55 | Ag/Ag <sup>+</sup> | 5.1   | Yes |
| 20 | H-CuTCPP@Cu(OH) <sub>2</sub>          | cluster | Cu <sub>2</sub> (COO) <sub>4</sub>                   | 0, +1, +2 | CH <sub>3</sub> CN/H <sub>2</sub> O/EMIMBF <sub>4</sub> | H    | 56    | -1.7  | Ag/Ag <sup>+</sup> | 10    | Yes |
| 20 | nH-CuTCPP@Cu(OH) <sub>2</sub>         | cluster | Cu <sub>2</sub> (COO) <sub>4</sub>                   | 0, +1, +2 | CH <sub>3</sub> CN/H <sub>2</sub> O/EMIMBF <sub>4</sub> | H    | 53    | -1.7  | Ag/Ag <sup>+</sup> | 8     | Yes |
| 21 | Cu1                                   | node    | CuN <sub>2</sub>                                     | +1, +2    | 0.1 M KHCO <sub>3</sub>                                 | H    | 77.5  | -0.89 | RHE                | 4.5   | Yes |
| 21 | Cu2                                   | node    | CuN <sub>4</sub>                                     | NR*       | 0.1 M KHCO <sub>3</sub>                                 | H    | 64.6  | -0.96 | RHE                | 4.5   | No  |
| 21 | Cu3                                   | node    | CuN <sub>4</sub>                                     | NR*       | 0.1 M KHCO <sub>3</sub>                                 | H    | 50.5  | -0.99 | RHE                | 4.4   | No  |
| 22 | Cu <sub>2</sub> O@Cu-HHTP             | node    | CuO <sub>4</sub>                                     | +1, +2    | 0.1 M KCl + 0.1 M KHCO <sub>3</sub>                     | H    | 80    | -1.4  | RHE                | 14.8  | Yes |
| 22 | Cu-HHTP                               | node    | CuO <sub>4</sub>                                     | +2        | 0.1 M KCl + 0.1 M KHCO <sub>3</sub>                     | H    | 20    | -1.4  | RHE                | 9.5   | Yes |
| 23 | Cu-DBC                                | node    | CuO <sub>5</sub>                                     | +1, +2    | 1 M KOH                                                 | Flow | 86.5  | -0.9  | RHE                | 203   | No  |
| 23 | Cu-HHTP                               | node    | CuO <sub>4</sub>                                     | NR*       | 1 M KOH                                                 | Flow | 88.5  | -0.9  | RHE                | 190   | No  |
| 24 | Cu(111)@Cu-THQ                        | node    | CuO <sub>4</sub>                                     | 0, +1, +2 | 0.1 M KHCO <sub>3</sub>                                 | H    | 78.2  | -1.2  | RHE                | 8.2   | No  |
| 25 | Cu-HITP                               | node    | CuN <sub>4</sub>                                     | +2        | 0.1 M KHCO <sub>3</sub>                                 | H    | 82    | -1.2  | RHE                | NR    | No  |
| 25 | Cu-HITP@PDA                           | node    | CuN <sub>4</sub>                                     | +2        | 0.1 M KHCO <sub>3</sub>                                 | H    | 87.15 | -1.2  | RHE                | 4.76  | No  |
| 25 | Cu-HITP@PANI                          | node    | CuN <sub>4</sub>                                     | +2        | 0.1 M KHCO <sub>3</sub>                                 | H    | 88.5  | -1.2  | RHE                | NR    | No  |
| 25 | Cu-HITP@PPV                           | node    | CuN <sub>4</sub>                                     | +2        | 0.1 M KHCO <sub>3</sub>                                 | H    | 71    | -1.2  | RHE                | NR    | No  |
| 26 | PcCu-O <sub>8</sub> -Cu               | node    | CuO <sub>4</sub>                                     | NR*       | 0.1 M KHCO <sub>3</sub>                                 | H    | 10    | -1.1  | RHE                | 16    | No  |
| 26 | PcZn-O <sub>8</sub> -Cu               | node    | CuO <sub>4</sub>                                     | NR*       | 0.1 M KHCO <sub>3</sub>                                 | H    | 10    | -1.1  | RHE                | 10    | No  |
| 27 | CPF                                   | cluster | Cu <sub>2</sub> (COO) <sub>4</sub>                   | +2        | 0.1 M KHCO <sub>3</sub>                                 | H    | 81.57 | -1.4  | RHE                | 10.1  | Yes |
| 28 | CuBDC                                 | cluster | Cu <sub>2</sub> (COO) <sub>4</sub>                   | +2        | 0.1 M KI                                                | H    | 67    | -1.1  | RHE                | NR*   | No  |
| 28 | Cu <sub>2</sub> BDC                   | cluster | Cu <sub>2</sub> (OH) <sub>2</sub> (COO) <sub>4</sub> | +1, +2    | 0.1 M KI                                                | H    | 65    | -1.3  | RHE                | NR*   | No  |
| 29 | Cu <sub>4</sub> <sup>II</sup> -MFU-4l | cluster | Cu <sub>4</sub> Zn                                   | +1, +2    | 0.5 M NaHCO <sub>3</sub>                                | H    | 98    | -1.2  | RHE                | 10.65 | No  |
| 30 | MAF-2E                                | cluster | Cu <sub>2</sub> N <sub>4</sub>                       | +1        | 0.1 M KHCO <sub>3</sub>                                 | H    | 75.9  | -1.3  | RHE                | 10.9  | No  |
| 30 | MAF-2ME                               | cluster | Cu <sub>2</sub> N <sub>4</sub>                       | +1        | 0.1 M KHCO <sub>3</sub>                                 | H    | 68.6  | -1.2  | RHE                | 9     | No  |
| 30 | MAF-2P                                | cluster | Cu <sub>2</sub> N <sub>4</sub>                       | +1        | 0.1 M KHCO <sub>3</sub>                                 | H    | 81    | -1.4  | RHE                | 13    | No  |

† name used in original publication. See Supplementary Data File for alternative names. \* not reported. ^ three-electrode single compartment cell

**Table S2: >2e<sup>-</sup> Product Faradaic Efficiencies for Cu MOF and Cu MOF Composites.**

| Ref | Cu MOF                              | Cluster or Node-based <sup>1</sup> | Secondary Building Unit                               | Cu Oxidation State | Electrolyte                    | Cell Type | FE >2e <sup>-2</sup> | Reported Potential (V) | Scale   | Total Current Density (mA cm <sup>-2</sup> ) <sup>3</sup> | Evidence of In Situ Transformation <sup>4</sup> |
|-----|-------------------------------------|------------------------------------|-------------------------------------------------------|--------------------|--------------------------------|-----------|----------------------|------------------------|---------|-----------------------------------------------------------|-------------------------------------------------|
| 1   | CuAdeAce                            | cluster                            | Cu <sub>2</sub> (ade) <sub>2</sub> (ace) <sub>2</sub> | NR*                | 0.5 M KHCO <sub>3</sub>        | Flow      | 1.2                  | -1.75                  | Ag/AgCl | 10                                                        | Yes                                             |
| 1   | HKUST-1                             | cluster                            | Cu <sub>2</sub> (COO) <sub>4</sub>                    | NR*                | 0.5 M KHCO <sub>3</sub>        | Flow      | 15.9                 | -0.9                   | Ag/AgCl | 10                                                        | Yes                                             |
| 2   | CuBi9                               | cluster                            | Cu <sub>2</sub> (COO) <sub>4</sub>                    | NR*                | 0.5 M KHCO <sub>3</sub>        | Flow      | 31                   | -0.36                  | RHE     | 20                                                        | No                                              |
| 2   | CuBi12                              | cluster                            | Cu <sub>2</sub> (COO) <sub>4</sub>                    | NR*                | 0.5 M KHCO <sub>3</sub>        | Flow      | 42.3                 | -0.21                  | RHE     | 20                                                        | Yes                                             |
| 2   | CuBi84                              | cluster                            | Cu <sub>2</sub> (COO) <sub>4</sub>                    | NR*                | 0.5 M KHCO <sub>3</sub>        | Flow      | 9                    | -0.34                  | RHE     | 20                                                        | No                                              |
| 2   | Cu100                               | cluster                            | Cu <sub>2</sub> (COO) <sub>4</sub>                    | NR*                | 0.5 M KHCO <sub>3</sub>        | Flow      | 20                   | -0.59                  | RHE     | 20                                                        | Yes                                             |
| 3   | Cu-BDC                              | cluster                            | Cu <sub>2</sub> (COO) <sub>4</sub>                    | +1, +2             | 1 M KOH                        | Flow      | 50                   | -1.35                  | RHE     | 120                                                       | Yes                                             |
| 3   | NH <sub>2</sub> -Cu-BDC             | cluster                            | Cu <sub>2</sub> (COO) <sub>4</sub>                    | +1, +2             | 1 M KOH                        | Flow      | 46                   | -1.62                  | RHE     | 180                                                       | Yes                                             |
| 3   | OH-Cu-BDC                           | cluster                            | Cu <sub>2</sub> (COO) <sub>4</sub>                    | +1, +2             | 1 M KOH                        | Flow      | 44                   | -1.71                  | RHE     | 180                                                       | Yes                                             |
| 3   | F-Cu-BDC                            | cluster                            | Cu <sub>2</sub> (COO) <sub>4</sub>                    | +1, +2             | 1 M KOH                        | Flow      | 54                   | -1.77                  | RHE     | 180                                                       | Yes                                             |
| 3   | 2F-Cu-BDC                           | cluster                            | Cu <sub>2</sub> (COO) <sub>4</sub>                    | +1, +2             | 1 M KOH                        | Flow      | 69                   | -1.45                  | RHE     | 150                                                       | Yes                                             |
| 4   | NNU-50                              | cluster                            | Cu <sub>6</sub> MePz                                  | NR*                | 1 M KOH                        | Flow      | 81.5                 | -1                     | RHE     | 398.02                                                    | No                                              |
| 5   | CR-MOF                              | node                               | CuN <sub>2</sub> S <sub>2</sub>                       | NR*                | 0.5 M KHCO <sub>3</sub>        | H         | 0                    | -1.6                   | SHE     | 20.95                                                     | No                                              |
| 6   | Cu <sub>3</sub> (HHTP) <sub>2</sub> | node                               | CuO <sub>4</sub>                                      | NR*                | 0.1 M KHCO <sub>3</sub>        | H         | 1.9                  | -0.3                   | RHE     | 0.5                                                       | No                                              |
| 6   | Cu <sub>3</sub> (HHTQ) <sub>2</sub> | node                               | CuO <sub>4</sub>                                      | +2                 | 0.1 M KHCO <sub>3</sub>        | H         | 53.6                 | -0.4                   | RHE     | 0.5                                                       | No                                              |
| 7   | HATNA-Cu-MOF                        | node                               | CuO <sub>4</sub>                                      | +1, +2             | 0.1 M KHCO <sub>3</sub>        | H         | 80                   | -1.5                   | RHE     | 10.5                                                      | No                                              |
| 8   | Cu-DBC                              | node                               | CuO <sub>5</sub>                                      | +1, +2             | 0.1 M KHCO <sub>3</sub>        | H         | 67                   | -1.4                   | RHE     | 11.4                                                      | No                                              |
| 9   | Cu-THQ                              | node                               | CuO <sub>4</sub>                                      | +1, +2             | 1 M choline chloride + 1 M KOH | H         | 0                    | -0.43                  | RHE     | 173                                                       | No                                              |
| 10  | Cu <sub>3</sub> (HHTP) <sub>2</sub> | node                               | CuO <sub>4</sub>                                      | NR*                | KHCO <sub>3</sub>              | H         | 0                    | -0.64                  | RHE     | NR*                                                       | No                                              |
| 10  | CoPc-Cu-O                           | node                               | CuO <sub>4</sub>                                      | +1, +2             | KHCO <sub>3</sub>              | H         | 0                    | -0.74                  | RHE     | 17.1                                                      | No                                              |
| 10  | CoPc-Cu-NH                          | node                               | CuN <sub>4</sub>                                      | +1, +2             | KHCO <sub>3</sub>              | H         | 0                    | -0.74                  | RHE     | 11.6                                                      | No                                              |

|    |                                     |         |                                    |           |                         |      |      |       |                    |       |     |
|----|-------------------------------------|---------|------------------------------------|-----------|-------------------------|------|------|-------|--------------------|-------|-----|
| 10 | NiPc-Cu-O                           | node    | CuO <sub>4</sub>                   | +1, +2    | KHCO <sub>3</sub>       | H    | 0    | -0.74 | RHE                | 7.3   | Yes |
| 10 | NiPc-Cu-NH                          | node    | CuN <sub>4</sub>                   | +1, +2    | KHCO <sub>3</sub>       | H    | 0    | -0.74 | RHE                | 6.1   | No  |
| 10 | Pc-Cu-O                             | node    | CuO <sub>4</sub>                   | +1, +2    | KHCO <sub>3</sub>       | H    | 0    | -0.74 | RHE                | 7.5   | Yes |
| 10 | Pc-Cu-NH                            | node    | CuN <sub>4</sub>                   | +1, +2    | KHCO <sub>3</sub>       | H    | 0    | -0.74 | RHE                | 8     | No  |
| 10 | Cu <sub>3</sub> (HITP) <sub>2</sub> | node    | CuN <sub>4</sub>                   | NR*       | KHCO <sub>3</sub>       | H    | 0    | -0.74 | RHE                | n/a   | No  |
| 11 | HKUST-1                             | cluster | Cu <sub>2</sub> (COO) <sub>4</sub> | +2        | 1 M KOH                 | Flow | 30   | -1.08 | RHE                | NR*   | Yes |
| 11 | HKUST-1 (thermally treated)         | cluster | Cu <sub>2</sub> (COO) <sub>4</sub> | +1, +2    | 1 M KOH                 | Flow | 45   | -1.07 | RHE                | 262   | Yes |
| 12 | PcCu-Cu-O                           | node    | CuO <sub>4</sub>                   | +1, +2    | 0.1 M KHCO <sub>3</sub> | H    | 68   | -1.4  | RHE                | 7.8   | No  |
| 12 | PcCo-Cu-O                           | node    | CuO <sub>4</sub>                   | NR*       | 0.1 M KHCO <sub>3</sub> | H    | 12   | -1.2  | RHE                | NR*   | No  |
| 12 | Cu-HHTP                             | node    | CuO <sub>4</sub>                   | NR*       | 0.1 M KHCO <sub>3</sub> | H    | 0    | -1.2  | RHE                | NR*   | No  |
| 13 | HKUST-1                             | cluster | Cu <sub>2</sub> (COO) <sub>4</sub> | 0, +1, +2 | 0.01 M TBATFB/DMF       | 3EC^ | 51   | -2.5  | Ag/Ag <sup>+</sup> | NR*   | No  |
| 14 | Cu <sub>2</sub> O@Cu-MOF            | cluster | Cu <sub>2</sub> (COO) <sub>4</sub> | 0, +1, +2 | 0.1 M KHCO <sub>3</sub> | H    | 83.5 | -1.71 | RHE                | 13.29 | Yes |
| 14 | Cu-MOF                              | cluster | Cu <sub>2</sub> (COO) <sub>4</sub> | +1, +2    | 0.1 M KHCO <sub>3</sub> | H    | 49.7 | -1.71 | RHE                | n/a   | Yes |
| 15 | PCZ-2                               | cluster | Cu <sub>2</sub> (COO) <sub>4</sub> | 0, +1, +2 | 0.1 M KHCO <sub>3</sub> | H    | 0    | -0.75 | RHE                | 2.6   | No  |
| 16 | Cu-MOF-74                           | cluster | Cu-O-C rod                         | +1, +2    | 0.1 M KHCO <sub>3</sub> | H    | 0    | -1.8  | SCE                | 4     | No  |
| 17 | CuO/Cu-MOF                          | cluster | Cu <sub>2</sub> (COO) <sub>4</sub> | +2        | 0.1 M KHCO <sub>3</sub> | H    | 57   | -1.1  | RHE                | 14    | Yes |
| 17 | Cu-MOF                              | cluster | Cu <sub>2</sub> (COO) <sub>4</sub> | NR*       | 0.1 M KHCO <sub>3</sub> | H    | 40   | -1.1  | RHE                | 12.7  | No  |
| 17 | 2Cl-Cu-BDC                          | cluster | Cu <sub>2</sub> (COO) <sub>4</sub> | NR*       | 0.1 M KHCO <sub>3</sub> | H    | 26   | -1.1  | RHE                | 10    | No  |
| 17 | 2Br-Cu-BDC                          | cluster | Cu <sub>2</sub> (COO) <sub>4</sub> | NR*       | 0.1 M KHCO <sub>3</sub> | H    | 30   | -1.1  | RHE                | 10    | No  |
| 17 | 2OH-Cu-BDC                          | cluster | Cu <sub>2</sub> (COO) <sub>4</sub> | NR*       | 0.1 M KHCO <sub>3</sub> | H    | 4    | -1.1  | RHE                | NR*   | No  |
| 17 | 2NH <sub>2</sub> -Cu-BDC            | cluster | Cu <sub>2</sub> (COO) <sub>4</sub> | NR*       | 0.1 M KHCO <sub>3</sub> | H    | 6    | -1.1  | RHE                | NR*   | No  |
| 17 | NH <sub>2</sub> -Cu-BDC             | cluster | Cu <sub>2</sub> (COO) <sub>4</sub> | NR*       | 0.1 M KHCO <sub>3</sub> | H    | 5    | -1.1  | RHE                | NR*   | No  |
| 18 | PA-Cu-DBC-1                         | node    | CuO <sub>5</sub>                   | +2        | 0.5 M KHCO <sub>3</sub> | H    | 82.4 | -1.1  | RHE                | 47    | No  |
| 18 | PA-Cu-DBC-2                         | node    | CuO <sub>5</sub>                   | +2        | 0.5 M KHCO <sub>3</sub> | H    | 42   | -1.1  | RHE                | 36    | No  |
| 18 | Cu-DBC                              | node    | CuO <sub>5</sub>                   | +2        | 0.5 M KHCO <sub>3</sub> | H    | 12   | -1    | RHE                | 16    | No  |

|    |                                       |         |                                                      |           |                                                         |      |       |       |                    |       |     |
|----|---------------------------------------|---------|------------------------------------------------------|-----------|---------------------------------------------------------|------|-------|-------|--------------------|-------|-----|
| 19 | Cu <sub>2</sub> (CuTCPP)              | cluster | Cu <sub>2</sub> (COO) <sub>4</sub>                   | +1, +2    | CH <sub>3</sub> CN/H <sub>2</sub> O/EMIMBF <sub>4</sub> | H    | 16.8  | -1.55 | Ag/Ag <sup>+</sup> | 5.1   | Yes |
| 20 | H-CuTCPP@Cu(OH) <sub>2</sub>          | cluster | Cu <sub>2</sub> (COO) <sub>4</sub>                   | 0, +1, +2 | CH <sub>3</sub> CN/H <sub>2</sub> O/EMIMBF <sub>4</sub> | H    | 26.1  | -1.6  | Ag/Ag <sup>+</sup> | 8     | Yes |
| 20 | nH-CuTCPP@Cu(OH) <sub>2</sub>         | cluster | Cu <sub>2</sub> (COO) <sub>4</sub>                   | 0, +1, +2 | CH <sub>3</sub> CN/H <sub>2</sub> O/EMIMBF <sub>4</sub> | H    | 19.8  | -1.6  | Ag/Ag <sup>+</sup> | 7     | Yes |
| 21 | Cu1                                   | node    | CuN <sub>2</sub>                                     | +1, +2    | 0.1 M KHCO <sub>3</sub>                                 | H    | 0     | -0.89 | RHE                | 4.5   | Yes |
| 21 | Cu2                                   | node    | CuN <sub>4</sub>                                     | NR*       | 0.1 M KHCO <sub>3</sub>                                 | H    | 0     | -0.96 | RHE                | 4.5   | No  |
| 21 | Cu3                                   | node    | CuN <sub>4</sub>                                     | NR*       | 0.1 M KHCO <sub>3</sub>                                 | H    | 0     | -0.99 | RHE                | 4.4   | No  |
| 22 | Cu <sub>2</sub> O@Cu-HHTP             | node    | CuO <sub>4</sub>                                     | +1, +2    | 0.1 M KCl + 0.1 M KHCO <sub>3</sub>                     | H    | 76    | -1.4  | RHE                | 14.8  | Yes |
| 22 | Cu-HHTP                               | node    | CuO <sub>4</sub>                                     | +2        | 0.1 M KCl + 0.1 M KHCO <sub>3</sub>                     | H    | 0     | -1.4  | RHE                | 9.5   | Yes |
| 23 | Cu-DBC                                | node    | CuO <sub>5</sub>                                     | +1, +2    | 1 M KOH                                                 | Flow | 86    | -0.9  | RHE                | 203   | No  |
| 23 | Cu-HHTP                               | node    | CuO <sub>4</sub>                                     | NR*       | 1 M KOH                                                 | Flow | 83.5  | -0.9  | RHE                | 190   | No  |
| 24 | Cu(111)@Cu-THQ                        | node    | CuO <sub>4</sub>                                     | 0, +1, +2 | 0.1 M KHCO <sub>3</sub>                                 | H    | 76.4  | -1.6  | RHE                | 21    | No  |
| 25 | Cu-HITP                               | node    | CuN <sub>4</sub>                                     | NR*       | 0.1 M KHCO <sub>3</sub>                                 | H    | 62    | -1.2  | RHE                | NR*   | No  |
| 25 | Cu-HITP@PDA                           | node    | CuN <sub>4</sub>                                     | +2        | 0.1 M KHCO <sub>3</sub>                                 | H    | 79.85 | -1.2  | RHE                | 4.76  | No  |
| 25 | Cu-HITP@PANI                          | node    | CuN <sub>4</sub>                                     | NR*       | 0.1 M KHCO <sub>3</sub>                                 | H    | 73.5  | -1.2  | RHE                | NR*   | No  |
| 25 | Cu-HITP@PPV                           | node    | CuN <sub>4</sub>                                     | NR*       | 0.1 M KHCO <sub>3</sub>                                 | H    | 58    | -1.2  | RHE                | NR*   | No  |
| 26 | PcCu-O <sub>8</sub> -Cu               | node    | CuO <sub>4</sub>                                     | NR*       | 0.1 M KHCO <sub>3</sub>                                 | H    | 0     | -1.1  | RHE                | 16    | No  |
| 26 | PcZn-O <sub>8</sub> -Cu               | node    | CuO <sub>4</sub>                                     | NR*       | 0.1 M KHCO <sub>3</sub>                                 | H    | 0     | -1.1  | RHE                | 10    | No  |
| 27 | CPF                                   | cluster | Cu <sub>2</sub> (COO) <sub>4</sub>                   | +2        | 0.1 M KHCO <sub>3</sub>                                 | H    | 73.57 | -1.4  | RHE                | 10.1  | Yes |
| 28 | CuBDC                                 | cluster | Cu <sub>2</sub> (COO) <sub>4</sub>                   | +2        | 0.1 M KI                                                | H    | 31    | -1.4  | RHE                | NR*   | No  |
| 28 | Cu <sub>2</sub> BDC                   | cluster | Cu <sub>2</sub> (OH) <sub>2</sub> (COO) <sub>4</sub> | +1, +2    | 0.1 M KI                                                | H    | 48    | -1.3  | RHE                | NR*   | No  |
| 29 | Cu <sub>4</sub> <sup>II</sup> -MFU-4l | cluster | Cu <sub>4</sub> Zn                                   | +1, +2    | 0.5 M NaHCO <sub>3</sub>                                | H    | 92    | -1.2  | RHE                | 10.65 | No  |
| 30 | MAF-2E                                | cluster | Cu <sub>2</sub> N <sub>4</sub>                       | +1        | 0.1 M KHCO <sub>3</sub>                                 | H    | 70.7  | -1.4  | RHE                | 16    | No  |
| 30 | MAF-2ME                               | cluster | Cu <sub>2</sub> N <sub>4</sub>                       | +1        | 0.1 M KHCO <sub>3</sub>                                 | H    | 57.9  | -1.5  | RHE                | 17.5  | No  |
| 30 | MAF-2P                                | cluster | Cu <sub>2</sub> N <sub>4</sub>                       | +1        | 0.1 M KHCO <sub>3</sub>                                 | H    | 77.1  | -1.5  | RHE                | 14    | No  |

† name used in original publication. See Supplementary Data File for alternative names. \* not reported. ^ three-electrode single compartment cell

**Table S3: C<sub>2+</sub> Product Faradaic Efficiencies for Cu MOF and Cu MOF Composites.**

| Ref | Cu MOF                              | Cluster or Node-based <sup>1</sup> | Secondary Building Unit                               | Cu Oxidation State | Electrolyte                    | Cell Type | FE C <sub>2+</sub> <sup>2</sup> | Reported Potential (V) | Scale   | Total Current Density (mA cm <sup>-2</sup> ) <sup>3</sup> | Evidence of In Situ Transformation <sup>4</sup> |
|-----|-------------------------------------|------------------------------------|-------------------------------------------------------|--------------------|--------------------------------|-----------|---------------------------------|------------------------|---------|-----------------------------------------------------------|-------------------------------------------------|
| 1   | CuAdeAce                            | cluster                            | Cu <sub>2</sub> (ade) <sub>2</sub> (ace) <sub>2</sub> | NR*                | 0.5 M KHCO <sub>3</sub>        | Flow      | 0.5                             | -1.75                  | Ag/AgCl | 10                                                        | Yes                                             |
| 1   | HKUST-1                             | cluster                            | Cu <sub>2</sub> (COO) <sub>4</sub>                    | NR*                | 0.5 M KHCO <sub>3</sub>        | Flow      | 10.3                            | -0.9                   | Ag/AgCl | 10                                                        | Yes                                             |
| 2   | CuBi9                               | cluster                            | Cu <sub>2</sub> (COO) <sub>4</sub>                    | NR*                | 0.5 M KHCO <sub>3</sub>        | Flow      | 21                              | -0.36                  | RHE     | 20                                                        | No                                              |
| 2   | CuBi12                              | cluster                            | Cu <sub>2</sub> (COO) <sub>4</sub>                    | NR*                | 0.5 M KHCO <sub>3</sub>        | Flow      | 33.3                            | -0.21                  | RHE     | 20                                                        | Yes                                             |
| 2   | CuBi84                              | cluster                            | Cu <sub>2</sub> (COO) <sub>4</sub>                    | NR*                | 0.5 M KHCO <sub>3</sub>        | Flow      | 3                               | -0.34                  | RHE     | 20                                                        | No                                              |
| 2   | Cu100                               | cluster                            | Cu <sub>2</sub> (COO) <sub>4</sub>                    | NR*                | 0.5 M KHCO <sub>3</sub>        | Flow      | 18                              | -0.59                  | RHE     | 20                                                        | Yes                                             |
| 3   | Cu-BDC                              | cluster                            | Cu <sub>2</sub> (COO) <sub>4</sub>                    | +1, +2             | 1 M KOH                        | Flow      | 42                              | -1.35                  | RHE     | 120                                                       | Yes                                             |
| 3   | NH <sub>2</sub> -Cu-BDC             | cluster                            | Cu <sub>2</sub> (COO) <sub>4</sub>                    | +1, +2             | 1 M KOH                        | Flow      | 24                              | -1.38                  | RHE     | 150                                                       | Yes                                             |
| 3   | OH-Cu-BDC                           | cluster                            | Cu <sub>2</sub> (COO) <sub>4</sub>                    | +1, +2             | 1 M KOH                        | Flow      | 29                              | -1.71                  | RHE     | 180                                                       | Yes                                             |
| 3   | F-Cu-BDC                            | cluster                            | Cu <sub>2</sub> (COO) <sub>4</sub>                    | +1, +2             | 1 M KOH                        | Flow      | 47                              | -1.21                  | RHE     | 90                                                        | Yes                                             |
| 3   | 2F-Cu-BDC                           | cluster                            | Cu <sub>2</sub> (COO) <sub>4</sub>                    | +1, +2             | 1 M KOH                        | Flow      | 63                              | -1.45                  | RHE     | 150                                                       | Yes                                             |
| 4   | NNU-50                              | cluster                            | Cu <sub>6</sub> MePz                                  | NR*                | 1 M KOH                        | Flow      | 29.12                           | -0.8                   | RHE     | 183                                                       | No                                              |
| 5   | CR-MOF                              | node                               | CuN <sub>2</sub> S <sub>2</sub>                       | NR*                | 0.5 M KHCO <sub>3</sub>        | H         | 0                               | -1.6                   | SHE     | 20.95                                                     | No                                              |
| 6   | Cu <sub>3</sub> (HHTP) <sub>2</sub> | node                               | CuO <sub>4</sub>                                      | NR*                | 0.1 M KHCO <sub>3</sub>        | H         | 1.9                             | -0.3                   | RHE     | 0.5                                                       | No                                              |
| 6   | Cu <sub>3</sub> (HHTQ) <sub>2</sub> | node                               | CuO <sub>4</sub>                                      | +2                 | 0.1 M KHCO <sub>3</sub>        | H         | 53.6                            | -0.4                   | RHE     | 0.5                                                       | No                                              |
| 7   | HATNA-Cu-MOF                        | node                               | CuO <sub>4</sub>                                      | +1, +2             | 0.1 M KHCO <sub>3</sub>        | H         | 8                               | -1.2                   | RHE     | 4.2                                                       | No                                              |
| 8   | Cu-DBC                              | node                               | CuO <sub>5</sub>                                      | +1, +2             | 0.1 M KHCO <sub>3</sub>        | H         | 16                              | -1.2                   | RHE     | 5                                                         | No                                              |
| 9   | Cu-THQ                              | node                               | CuO <sub>4</sub>                                      | +1, +2             | 1 M choline chloride + 1 M KOH | H         | 0                               | -0.43                  | RHE     | 173                                                       | No                                              |
| 10  | Cu <sub>3</sub> (HHTP) <sub>2</sub> | node                               | CuO <sub>4</sub>                                      | NR*                | KHCO <sub>3</sub>              | H         | 0                               | -0.64                  | RHE     | NR*                                                       | No                                              |
| 10  | CoPc-Cu-O                           | node                               | CuO <sub>4</sub>                                      | +1, +2             | KHCO <sub>3</sub>              | H         | 0                               | -0.74                  | RHE     | 17.1                                                      | No                                              |
| 10  | CoPc-Cu-NH                          | node                               | CuN <sub>4</sub>                                      | +1, +2             | KHCO <sub>3</sub>              | H         | 0                               | -0.74                  | RHE     | 11.6                                                      | No                                              |



|    |                                     |         |                                    |           |                         |      |      |       |                    |      |     |
|----|-------------------------------------|---------|------------------------------------|-----------|-------------------------|------|------|-------|--------------------|------|-----|
| 10 | NiPc-Cu-O                           | node    | CuO <sub>4</sub>                   | +1, +2    | KHCO <sub>3</sub>       | H    | 0    | -0.74 | RHE                | 7.3  | Yes |
| 10 | NiPc-Cu-NH                          | node    | CuN <sub>4</sub>                   | +1, +2    | KHCO <sub>3</sub>       | H    | 0    | -0.74 | RHE                | 6.1  | No  |
| 10 | Pc-Cu-O                             | node    | CuO <sub>4</sub>                   | +1, +2    | KHCO <sub>3</sub>       | H    | 0    | -0.74 | RHE                | 7.5  | Yes |
| 10 | Pc-Cu-NH                            | node    | CuN <sub>4</sub>                   | +1, +2    | KHCO <sub>3</sub>       | H    | 0    | -0.74 | RHE                | 8    | No  |
| 10 | Cu <sub>3</sub> (HITP) <sub>2</sub> | node    | CuN <sub>4</sub>                   | NR*       | KHCO <sub>3</sub>       | H    | 0    | -0.74 | RHE                | n/a  | No  |
| 11 | HKUST-1                             | cluster | Cu <sub>2</sub> (COO) <sub>4</sub> | +2        | 1 M KOH                 | Flow | 13   | -1.08 | RHE                | NR*  | Yes |
| 11 | HKUST-1 (thermally treated)         | cluster | Cu <sub>2</sub> (COO) <sub>4</sub> | +1, +2    | 1 M KOH                 | Flow | 45   | -1.07 | RHE                | 262  | Yes |
| 12 | PcCu-Cu-O                           | node    | CuO <sub>4</sub>                   | +1, +2    | 0.1 M KHCO <sub>3</sub> | H    | 50   | -1.2  | RHE                | 7.3  | No  |
| 12 | PcCo-Cu-O                           | node    | CuO <sub>4</sub>                   | NR*       | 0.1 M KHCO <sub>3</sub> | H    | 0    | -1    | RHE                | NR*  | No  |
| 12 | Cu-HHTP                             | node    | CuO <sub>4</sub>                   | NR*       | 0.1 M KHCO <sub>3</sub> | H    | 0    | -1.2  | RHE                | NR*  | No  |
| 13 | HKUST-1                             | cluster | Cu <sub>2</sub> (COO) <sub>4</sub> | 0, +1, +2 | 0.01 M TBATFB/DMF       | 3EC^ | 51   | -2.5  | Ag/Ag <sup>+</sup> | NR*  | No  |
| 14 | Cu <sub>2</sub> O@Cu-MOF            | cluster | Cu <sub>2</sub> (COO) <sub>4</sub> | 0, +1, +2 | 0.1 M KHCO <sub>3</sub> | H    | 35.4 | -1.31 | RHE                | 7    | Yes |
| 14 | Cu-MOF                              | cluster | Cu <sub>2</sub> (COO) <sub>4</sub> | +1, +2    | 0.1 M KHCO <sub>3</sub> | H    | 12.9 | -1.71 | RHE                | n/a  | Yes |
| 15 | PCZ-2                               | cluster | Cu <sub>2</sub> (COO) <sub>4</sub> | 0, +1, +2 | 0.1 M KHCO <sub>3</sub> | H    | 0    | -0.75 | RHE                | 2.6  | No  |
| 16 | Cu-MOF-74                           | cluster | Cu-O-C rod                         | +1, +2    | 0.1 M KHCO <sub>3</sub> | H    | 0    | -1.8  | SCE                | 4    | No  |
| 17 | CuO/Cu-MOF                          | cluster | Cu <sub>2</sub> (COO) <sub>4</sub> | +2        | 0.1 M KHCO <sub>3</sub> | H    | 50   | -1.1  | RHE                | 14   | Yes |
| 17 | Cu-MOF                              | cluster | Cu <sub>2</sub> (COO) <sub>4</sub> | NR*       | 0.1 M KHCO <sub>3</sub> | H    | 40   | -1.1  | RHE                | 12.7 | No  |
| 17 | 2Cl-Cu-BDC                          | cluster | Cu <sub>2</sub> (COO) <sub>4</sub> | NR*       | 0.1 M KHCO <sub>3</sub> | H    | 20   | -1.1  | RHE                | 10   | No  |
| 17 | 2Br-Cu-BDC                          | cluster | Cu <sub>2</sub> (COO) <sub>4</sub> | NR*       | 0.1 M KHCO <sub>3</sub> | H    | 30   | -1.1  | RHE                | 10   | No  |
| 17 | 2OH-Cu-BDC                          | cluster | Cu <sub>2</sub> (COO) <sub>4</sub> | NR*       | 0.1 M KHCO <sub>3</sub> | H    | 0    | -1.1  | RHE                | NR*  | No  |
| 17 | 2NH <sub>2</sub> -Cu-BDC            | cluster | Cu <sub>2</sub> (COO) <sub>4</sub> | NR*       | 0.1 M KHCO <sub>3</sub> | H    | 3    | -1.1  | RHE                | NR*  | No  |
| 17 | NH <sub>2</sub> -Cu-BDC             | cluster | Cu <sub>2</sub> (COO) <sub>4</sub> | NR*       | 0.1 M KHCO <sub>3</sub> | H    | 2    | -1.1  | RHE                | NR*  | No  |
| 18 | PA-Cu-DBC-1                         | node    | CuO <sub>5</sub>                   | +2        | 0.5 M KHCO <sub>3</sub> | H    | 8    | -1    | RHE                | 36   | No  |
| 18 | PA-Cu-DBC-2                         | node    | CuO <sub>5</sub>                   | +2        | 0.5 M KHCO <sub>3</sub> | H    | 11   | -1.1  | RHE                | 36   | No  |
| 18 | Cu-DBC                              | node    | CuO <sub>5</sub>                   | +2        | 0.5 M KHCO <sub>3</sub> | H    | 2    | -1    | RHE                | 16   | No  |

|    |                                       |         |                                                      |           |                                                         |      |       |       |                    |       |     |
|----|---------------------------------------|---------|------------------------------------------------------|-----------|---------------------------------------------------------|------|-------|-------|--------------------|-------|-----|
| 19 | Cu <sub>2</sub> (CuTCPP)              | cluster | Cu <sub>2</sub> (COO) <sub>4</sub>                   | +1, +2    | CH <sub>3</sub> CN/H <sub>2</sub> O/EMIMBF <sub>4</sub> | H    | 16.8  | -1.55 | Ag/Ag <sup>+</sup> | 5.1   | Yes |
| 20 | H-CuTCPP@Cu(OH) <sub>2</sub>          | cluster | Cu <sub>2</sub> (COO) <sub>4</sub>                   | 0, +1, +2 | CH <sub>3</sub> CN/H <sub>2</sub> O/EMIMBF <sub>4</sub> | H    | 26.1  | -1.6  | Ag/Ag <sup>+</sup> | 8     | Yes |
| 20 | nH-CuTCPP@Cu(OH) <sub>2</sub>         | cluster | Cu <sub>2</sub> (COO) <sub>4</sub>                   | 0, +1, +2 | CH <sub>3</sub> CN/H <sub>2</sub> O/EMIMBF <sub>4</sub> | H    | 19.8  | -1.6  | Ag/Ag <sup>+</sup> | 7     | Yes |
| 21 | Cu1                                   | node    | CuN <sub>2</sub>                                     | +1, +2    | 0.1 M KHCO <sub>3</sub>                                 | H    | 0     | -0.89 | RHE                | 4.5   | Yes |
| 21 | Cu2                                   | node    | CuN <sub>4</sub>                                     | NR*       | 0.1 M KHCO <sub>3</sub>                                 | H    | 0     | -0.96 | RHE                | 4.5   | No  |
| 21 | Cu3                                   | node    | CuN <sub>4</sub>                                     | NR*       | 0.1 M KHCO <sub>3</sub>                                 | H    | 0     | -0.99 | RHE                | 4.4   | No  |
| 22 | Cu <sub>2</sub> O@Cu-HHTP             | node    | CuO <sub>4</sub>                                     | +1, +2    | 0.1 M KCl + 0.1 M KHCO <sub>3</sub>                     | H    | 3     | -1.4  | RHE                | 14.8  | Yes |
| 22 | Cu-HHTP                               | node    | CuO <sub>4</sub>                                     | +2        | 0.1 M KCl + 0.1 M KHCO <sub>3</sub>                     | H    | 0     | -1.4  | RHE                | 9.5   | Yes |
| 23 | Cu-DBC                                | node    | CuO <sub>5</sub>                                     | +1, +2    | 1 M KOH                                                 | Flow | 19    | -0.7  | RHE                | 65    | No  |
| 23 | Cu-HHTP                               | node    | CuO <sub>4</sub>                                     | NR*       | 1 M KOH                                                 | Flow | 42    | -0.8  | RHE                | 105   | No  |
| 24 | Cu(111)@Cu-THQ                        | node    | CuO <sub>4</sub>                                     | 0, +1, +2 | 0.1 M KHCO <sub>3</sub>                                 | H    | 44.2  | -1.2  | RHE                | 8.2   | No  |
| 25 | Cu-HITP                               | node    | CuN <sub>4</sub>                                     | NR*       | 0.1 M KHCO <sub>3</sub>                                 | H    | 43    | -1.2  | RHE                | NR*   | No  |
| 25 | Cu-HITP@PDA                           | node    | CuN <sub>4</sub>                                     | +2        | 0.1 M KHCO <sub>3</sub>                                 | H    | 75.21 | -1.2  | RHE                | 4.76  | No  |
| 25 | Cu-HITP@PANI                          | node    | CuN <sub>4</sub>                                     | NR*       | 0.1 M KHCO <sub>3</sub>                                 | H    | 60.5  | -1.2  | RHE                | NR*   | No  |
| 25 | Cu-HITP@PPV                           | node    | CuN <sub>4</sub>                                     | NR*       | 0.1 M KHCO <sub>3</sub>                                 | H    | 24    | -1.2  | RHE                | NR*   | No  |
| 26 | PcCu-O <sub>8</sub> -Cu               | node    | CuO <sub>4</sub>                                     | NR*       | 0.1 M KHCO <sub>3</sub>                                 | H    | 0     | -1.1  | RHE                | 16    | No  |
| 26 | PcZn-O <sub>8</sub> -Cu               | node    | CuO <sub>4</sub>                                     | NR*       | 0.1 M KHCO <sub>3</sub>                                 | H    | 0     | -1.1  | RHE                | 10    | No  |
| 27 | CPF                                   | cluster | Cu <sub>2</sub> (COO) <sub>4</sub>                   | +2        | 0.1 M KHCO <sub>3</sub>                                 | H    | 32    | -1.1  | RHE                | 2     | Yes |
| 28 | CuBDC                                 | cluster | Cu <sub>2</sub> (COO) <sub>4</sub>                   | +2        | 0.1 M KI                                                | H    | 29    | -1.4  | RHE                | NR*   | No  |
| 28 | Cu <sub>2</sub> BDC                   | cluster | Cu <sub>2</sub> (OH) <sub>2</sub> (COO) <sub>4</sub> | +1, +2    | 0.1 M KI                                                | H    | 47    | -1.3  | RHE                | NR*   | No  |
| 29 | Cu <sub>4</sub> <sup>II</sup> -MFU-4l | cluster | Cu <sub>4</sub> Zn                                   | +1, +2    | 0.5 M NaHCO <sub>3</sub>                                | H    | 0     | -1.2  | RHE                | 10.65 | No  |
| 30 | MAF-2E                                | cluster | Cu <sub>2</sub> N <sub>4</sub>                       | +1        | 0.1 M KHCO <sub>3</sub>                                 | H    | 51.2  | -1.3  | RHE                | 10.9  | No  |
| 30 | MAF-2ME                               | cluster | Cu <sub>2</sub> N <sub>4</sub>                       | +1        | 0.1 M KHCO <sub>3</sub>                                 | H    | 47.7  | -1.3  | RHE                | 10.2  | No  |
| 30 | MAF-2P                                | cluster | Cu <sub>2</sub> N <sub>4</sub>                       | +1        | 0.1 M KHCO <sub>3</sub>                                 | H    | 35.7  | -1.2  | RHE                | 7.5   | No  |

† name used in original publication. See Supplementary Data File for alternative names. \* not reported. ^ three-electrode single compartment cell

Tables S1 to S3 show the raw CO<sub>2</sub>RR data used to generate Figures 14 and 17 in the main text. Note that to facilitate comparison, the tabulated potentials were converted from their reported values to the reversible hydrogen electrode using the following equations.

$$E_{\text{RHE}} = E_{\text{Ag/AgCl}} + 0.196 \text{ V} + 0.0591 \text{ V} \times \text{pH} \quad (1)$$

$$= E_{\text{Ag/Ag}^+} + 0.503 \text{ V} + 0.0591 \text{ V} \times \text{pH} \quad (2)$$

$$= E_{\text{SHE}} + 0.0591 \text{ V} \times \text{pH} \quad (3)$$

$$= E_{\text{SCE}} + 0.241 \text{ V} + 0.0591 \text{ V} \times \text{pH} \quad (4)$$

Regarding (2), note that the Ag/Ag<sup>+</sup> couple refers to the reference electrode comprised of non-aqueous 10 mM AgNO<sub>3</sub> in acetonitrile. The value of 0.503 V is obtained from Coetzee and Campion.<sup>31</sup>

Finally, the numbered points below correspond to the superscripts in the tables.

- <sup>1</sup> If the secondary building unit features more than one metal atom, it is classified as cluster-based; otherwise, the secondary building unit is classified as node-based.
- <sup>2</sup> The listed faradaic efficiencies are based on values reported in the text or data tables of the original publication, where available; otherwise, the listed faradaic efficiencies are extracted from graphs.
- <sup>3</sup> Based on geometric area. The listed current densities are based on values reported in the text or data tables of the original publication, where available; otherwise, the listed current densities are extracted from graphs.
- <sup>4</sup> Evidence of an in situ transformation is classified as:
  - observed differences in Cu MOF properties between ex situ characterizations (e.g., XPS, XRD, SEM) before and after reaction
  - observed differences in Cu MOF properties between operando/in situ and ex situ characterizations (e.g., XPS, XRD, SEM)
  - periods of unstable CO<sub>2</sub>RR performance (e.g., faradaic efficiency, current density, voltage) in chronoamperometric or galvanostatic measurements

Note that the purpose of this entry is to illustrate the dynamic nature of Cu MOF properties under CO<sub>2</sub>RR conditions. That is, an entry of “Yes” or “No” is not intended to indicate the stability of a given Cu MOF. For example, an entry of “Yes” may be due to XPS measurements which indicate an increase in the Cu(I)/Cu(II) ratio; in general, this may or may not indicate the formation of a Cu<sub>2</sub>O phase. Conversely, a study without post-reaction characterization or chronoamperometric measurements would receive an entry of “No” despite the unaddressed possibility of electrochemical reconstruction.

## Data Aggregation Methodology

In tabulating the number of unique Cu MOFs with  $>2e^-$  or  $C_{2+}$  product formation for Figures 14 and 17, we have excluded duplicate entries as follows. In the case of multiple reports of a Cu MOF with no explicit modifications to the Cu MOF itself, only one entry has been added to the total. Thus, the same Cu MOF under different reaction conditions was not considered as a unique instance of  $>2e^-$  or  $C_{2+}$  product formation by that Cu MOF. Additionally, we have excluded reports of Cu MOF composite systems wherein the as-synthesized catalyst consists of a copper, copper oxide, or copper hydroxide phase or a non-copper-based MOF material (e.g., Bi-based MOF CAU-17 or PDA-functionalized Cu-HITP). In addition to all the data for Tables S1, S2, and S3, the Supplementary Data File contains the following details for each Cu MOF included in the study:

- alternative names used to refer to identical Cu MOFs
- the ligand constituting the Cu MOF
- the copper coordination geometry (excluding solvent molecules)
- the atoms directly bonded to copper (“Cu linking atoms”)
- the presence of other transition metals in the Cu MOF catalyst (“Other TMs”)
- the conductive additives used in preparing the electrode (e.g., carbon nanotubes)
- the method by which the Cu MOF is applied to the electrode (e.g., spray coating)
- faradaic efficiencies for all  $CO_2RR$  products observed under the conditions of highest  $CO_2RR$ ,  $>2e^-$ , and  $C_{2+}$  product formation
- whether or not the reported potentials were iR corrected

## References

- 1 J. Albo, D. Vallejo, G. Beobide, O. Castillo, P. Castaño and A. Irabien, *ChemSusChem*, 2017, **10**, 1100–1109.
- 2 J. Albo, M. Perfecto-Irigaray, G. Beobide and A. Irabien, *J. CO<sub>2</sub> Util.*, 2019, **33**, 157–165.
- 3 R. Chen, L. Cheng, J. Liu, Y. Wang, W. Ge, C. Xiao, H. Jiang, Y. Li and C. Li, *Small*, 2022, 2200720.
- 4 L. Z. Dong, Y. F. Lu, R. Wang, J. Zhou, Y. Zhang, L. Zhang, J. Liu, S. L. Li and Y. Q. Lan, *Nano Res.*, 2022, **15**, 10185–10193.
- 5 R. Hinogami, S. Yotsuhashi, M. Deguchi, Y. Zenitani, H. Hashiba and Y. Yamada, *ECS Electrochem. Lett.*, 2012, **1**, H17.
- 6 J. Liu, D. Yang, Y. Zhou, G. Zhang, G. Xing, Y. Liu, Y. Ma, O. Terasaki, S. Yang and L. Chen, *Angew. Chem. Int. Ed.*, 2021, **60**, 14473–14479.
- 7 Y. Liu, S. Li, L. Dai, J. Li, J. Lv, Z. Zhu, A. Yin, P. Li and B. Wang, *Angew. Chem. Int. Ed.*, 2021, **60**, 16409–16415.
- 8 Y.-Y. Liu, H.-L. Zhu, Z.-H. Zhao, N.-Y. Huang, P.-Q. Liao and X.-M. Chen, *ACS Catal.*, 2022, **12**, 2749–2755.
- 9 L. Majidi, A. Ahmadiparidari, N. Shan, S. N. Misal, K. Kumar, Z. Huang, S. Rastegar, Z. Hemmat, X. Zou, P. Zapol, J. Cabana, L. A. Curtiss, A. Salehi-Khojin, L. Majidi, A. Ahmadiparidari, S. N. Misal, S. Rastegar, Z. Hemmat, A. Salehi-Khojin, N. Shan, P. Zapol, L. A. Curtiss, K. Kumar, J. Cabana, Z. Huang and X. Zou, *Adv. Mater.*, 2021, **33**, 2004393.
- 10 Z. Meng, J. Luo, W. Li and K. A. Mirica, *J. Am. Chem. Soc.*, 2020, **142**, 21656–21669.
- 11 D. H. Nam, O. S. Bushuyev, J. Li, P. De Luna, A. Seifitokaldani, C. T. Dinh, F. P. García De Arquer, Y. Wang, Z. Liang, A. H. Proppe, C. S. Tan, P. Todorović, O. Shekhah, C. M. Gabardo, J. W. Jo, J. Choi, M. J. Choi, S. W. Baek, J. Kim, D. Sinton, S. O. Kelley, M. Eddaoudi and E. H. Sargent, *J. Am. Chem. Soc.*, 2018, **140**, 11378–11386.
- 12 X. F. Qiu, H. L. Zhu, J. R. Huang, P. Q. Liao and X. M. Chen, *J. Am. Chem. Soc.*, 2021, **143**, 7242–7246.
- 13 R. Senthil Kumar, S. Senthil Kumar and M. Anbu Kulandainathan, *Electrochem. Commun.*, 2012, **25**, 70–73.
- 14 X. Tan, C. Yu, C. Zhao, H. Huang, X. Yao, X. Han, W. Guo, S. Cui, H. Huang and J. Qiu, *ACS Appl. Mater. Interfaces*, 2019, **11**, 9904–9910.
- 15 T. Van Phuc, J. S. Chung and S. H. Hur, *Catalysts*, 2021, **11**, 537.
- 16 T. Van Phuc, S. G. Kang, J. S. Chung and S. H. Hur, *Mater. Res. Bull.*, 2021, **138**, 111228.
- 17 L. Wang, X. Li, L. Hao, S. Hong, A. W. Robertson and Z. Sun, *Chin. J. Catal.*, 2022, **43**, 1049–1057.
- 18 S. Wei, X. Jiang, C. He, S. Wang, Q. Hu, X. Chai, X. Ren, H. Yang and C. He, *J. Mater. Chem. A*, 2022, **10**, 6187–6192.
- 19 J. X. Wu, S. Z. Hou, X. Da Zhang, M. Xu, H. F. Yang, P. S. Cao and Z. Y. Gu, *Chem. Sci.*, 2019, **10**, 2199–2205.
- 20 Y. H. Xiao, Y. X. Zhang, R. Zhai, Z. G. Gu and J. Zhang, *Sci. China Mater.*, 2021, **65**, 1269–1275.
- 21 T. Yan, P. Wang, Z.-H. Xu and W.-Y. Sun, *ACS Appl. Mater. Interfaces*, 2022, **14**, 13645–13652.

- 22 J. D. Yi, R. Xie, Z. L. Xie, G. L. Chai, T. F. Liu, R. P. Chen, Y. B. Huang and R. Cao, *Angew. Chem. Int. Ed.*, 2020, **59**, 23641–23648.
- 23 Y. Zhang, L. Z. Dong, S. Li, X. Huang, J. N. Chang, J. H. Wang, J. Zhou, S. L. Li and Y. Q. Lan, *Nat. Commun.*, 2021, **12**, 1–9.
- 24 Z. H. Zhao, K. Zheng, N. Y. Huang, H. L. Zhu, J. R. Huang, P. Q. Liao and X. M. Chen, *Chem. Commun.*, 2021, **57**, 12764–12767.
- 25 Z. H. Zhao, H. L. Zhu, J. R. Huang, P. Q. Liao and X. M. Chen, *ACS Catal.*, 2022, **12**, 7986–7993.
- 26 H. Zhong, M. Ghorbani-Asl, K. H. Ly, J. Zhang, J. Ge, M. Wang, Z. Liao, D. Makarov, E. Zschech, E. Brunner, I. M. Weidinger, J. Zhang, A. V. Krashennnikov, S. Kaskel, R. Dong and X. Feng, *Nat. Commun.*, 2020, **11**, 1–10.
- 27 Y. Zhou, S. Chen, S. Xi, Z. Wang, P. Deng, F. Yang, Y. Han, Y. Pang and B. Y. Xia, *Cell Rep. Phys. Sci.*, 2020, **1**, 100182.
- 28 X. Zhou, J. Dong, Y. Zhu, L. Liu, Y. Jiao, H. Li, Y. Han, K. Davey, Q. Xu, Y. Zheng and S. Z. Qiao, *J. Am. Chem. Soc.*, 2021, **143**, 6681–6690.
- 29 H. L. Zhu, J. R. Huang, X. W. Zhang, C. Wang, N. Y. Huang, P. Q. Liao and X. M. Chen, *ACS Catal.*, 2021, **11**, 11786–11792.
- 30 L. L. Zhuo, P. Chen, K. Zheng, X. W. Zhang, J. X. Wu, D. Y. Lin, S. Y. Liu, Z. S. Wang, J. Y. Liu, D. D. Zhou and J. P. Zhang, *Angew. Chem. Int. Ed.*, 2022, **61**, e202204967.
- 31 J. F. Coetzee and J. J. Champion, *J. Am. Chem. Soc.*, 1967, **89**, 2513–2517.
